# Supplementary material
Source: publisher figshare collection journal article supplement (https://acs.figshare.com/ndownloader/files/14803223)
Supplement: Supplementary file 1 [file 14803223]

**Supplementary Material for "Solvent polarity  
dependent excited state behavior and thermally  
active delayed fluorescence for  
triquinolonebenzene"**

Jinfeng Zhao, Hao Dong, Huan Yang,<sup>\*</sup> and Yujun Zheng<sup>\*</sup>

*School of Physics, Shandong University, Jinan 250100, China*

E-mail: h.yang@foxmail.com; yzheng@sdu.edu.cn

---

<sup>\*</sup>To whom correspondence should be addressed

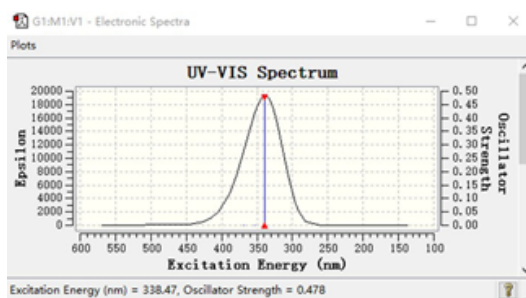

(a)

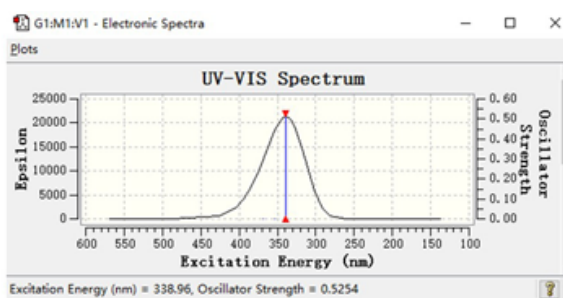

(b)

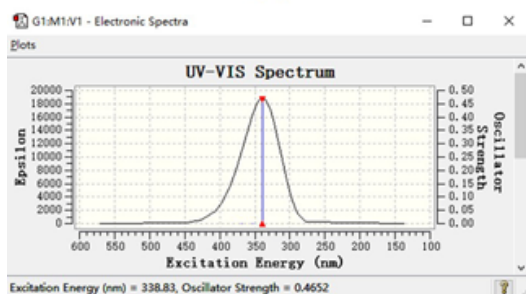

(c)

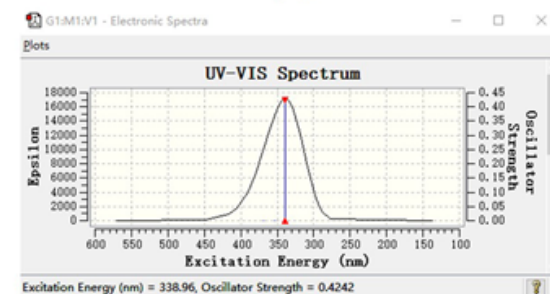

(d)

Figure S1: The theoretical absorption spectra of TQB-TA form in CYH (a), Tol (b),  $\text{CHCl}_3$  (c) and DMF (d) solvents. Herein, the peaks in each figures indicate the  $S_0 \rightarrow S_3$  transition since the oscillator strengths of  $S_0 \rightarrow S_1$  and  $S_0 \rightarrow S_2$  are almost 0.

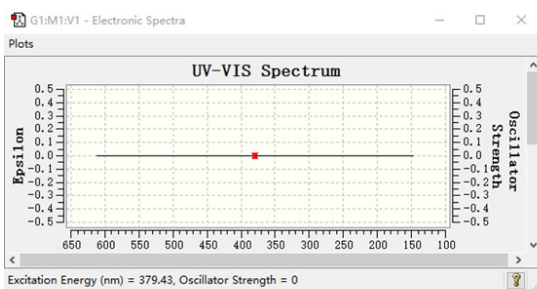

(a)

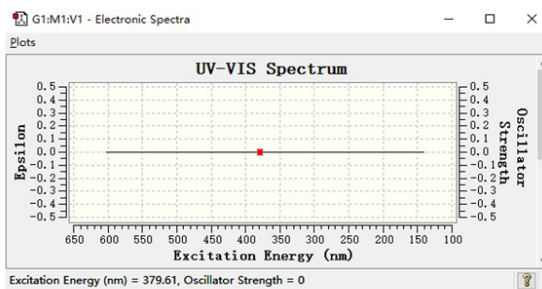

(b)

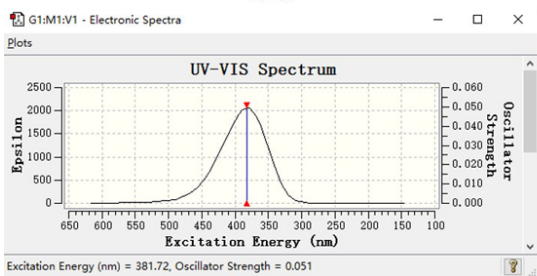

(c)

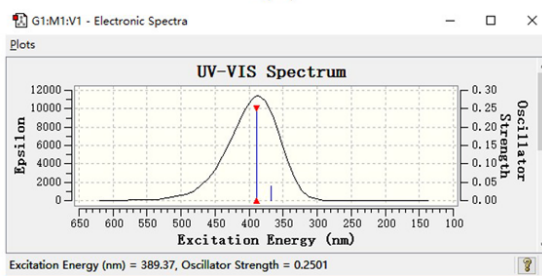

(d)

Figure S2: The theoretical  $S_1$ -state fluorescence spectra of TQB-TA form in CYH (a), Tol (b),  $\text{CHCl}_3$  (c) and DMF (d) solvents.

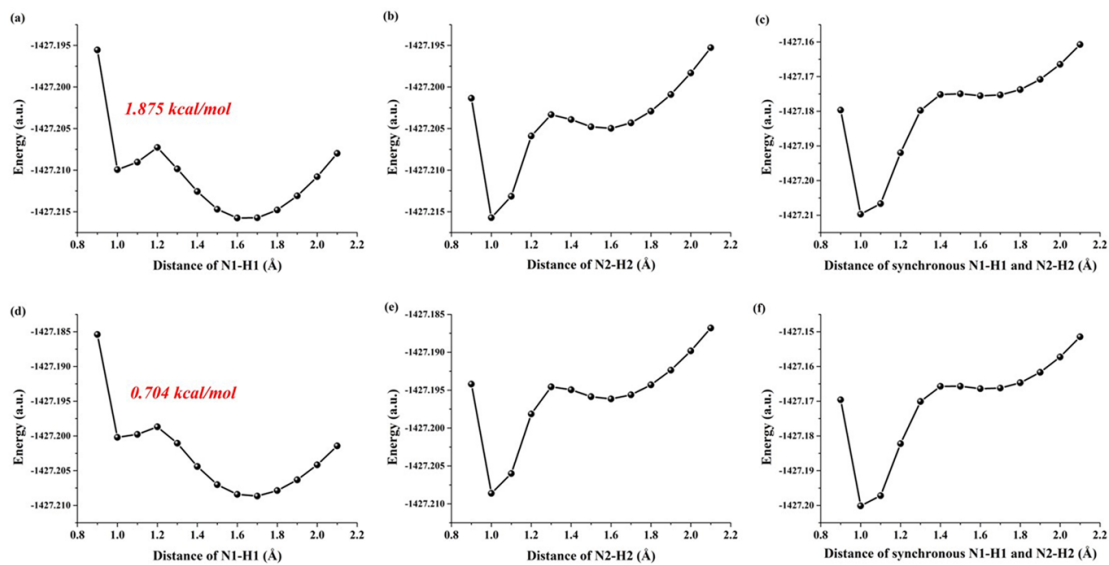

Figure S3: The constructed potential energy curves using Cam-B3LYP functional along with A → B, B → D and A → D paths in CYH (a-c) and DMF (d-f) solvents .

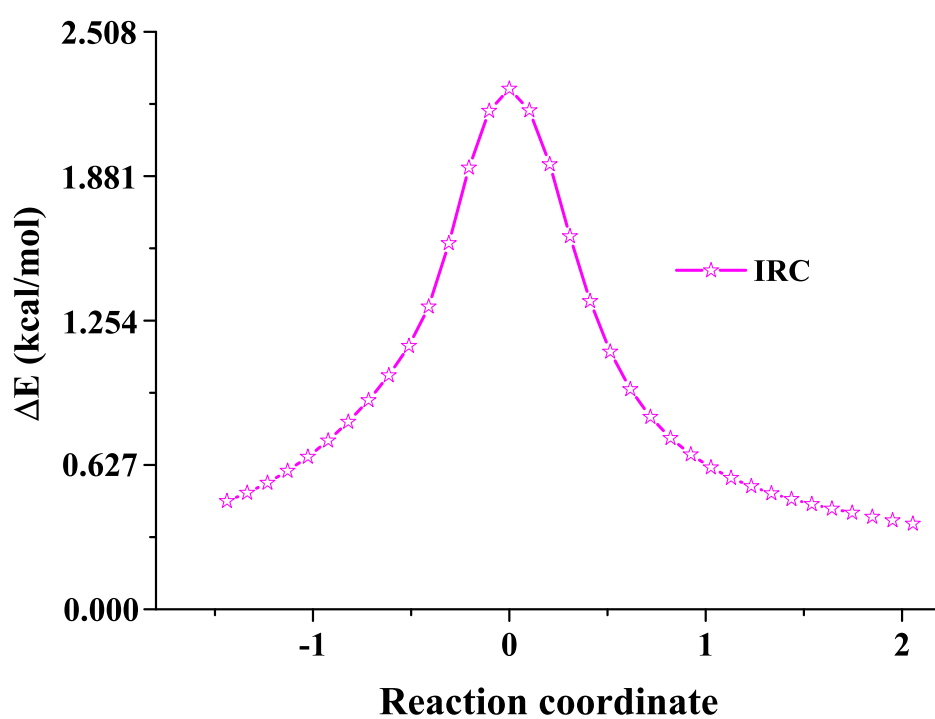

Figure S4: The energy profile along with the S<sub>1</sub>-state IRC for the ESIPT path (A → B or C) based on TDDFT/B3LYP/TZVP theoretical level.
